# Supplementary material for: BRCA1/MAD2L1 Deficiency Disrupts the Spindle Assembly Checkpoint to Confer Vinorelbine Resistance in Mesothelioma
Source: Oxford University Press journal article supplement (doi:10.1158/1535-7163.mct-20-0363), 2020-11-06
Supplement: 15357163mct200363-sup-242624_2_supp_6663008_q44m2l.xlsx [file 15357163mct200363-sup-242624_2_supp_6663008_q44m2l.xlsx]

## Sheet: FIGURE 1
FIGURE 1D
MSTO-211H	BUBR1 norm to Ctrl	BUBR1 norm to Ctrl
siNT NT	1	1
siNT VNB	1.26023	2.64635
siBRCA1 NT	2.02751	2.89253
siBRCA1 VNB	5.26176	4.29099
REN	BUBR1 norm to Ctrl	BUBR1 norm to Ctrl
siNT NT	1	1
siNT VNB	1.17847	0.876715
siBRCA1 NT	1.10807	0.812995
siBRCA1 VNB	0.979645	0.187287
FIGURE 1E
MSTO-211H	BRCA1 norm to Ctrl	BRCA1 norm to Ctrl
siNT NT	1	1
siNT VNB	1.12829	0.952288
siBRCA1 NT	0.155748	0.085554
siBRCA1 VNB	0.571124	0.0345433
REN	BRCA1 norm to Ctrl	BRCA1 norm to Ctrl
siNT NT	1	1
siNT VNB	0.0251904	0.0670798
siBRCA1 NT	0.0227857	0.0774138
siBRCA1 VNB	0.00545734	0.00815365

## Sheet: FIGURE 2
FIGURE 2B
MSTO-211H	BRCA1 norm to Ctrl	BRCA1 norm to Ctrl		MAD2L1 norm to Ctrl	MAD2L1 norm to Ctrl
siNT NT	1	1		1	1
siNT VNB	0.920456	0.917518		0.543914	0.734908
siBRCA1 NT	0.0202369	0.115155		0.135826	0.392126
siBRCA1 VNB	0.0214889	0.0326438		0.0271567	0.575881
REN	BRCA1 norm to Ctrl	BRCA1 norm to Ctrl		MAD2L1 norm to Ctrl	MAD2L1 norm to Ctrl
siNT NT	1	1		1	1
siNT VNB	0.0797317	0.0713147		1.32441	1.05617
siBRCA1 NT	0.0262404	0.0990278		0.23881	0.758554
siBRCA1 VNB	0.00453724	0.00697379		0.721056	0.445722
FIGURE 2C
MSTO-211H	MAD2L1 norm to Ctrl	MAD2L1 norm to Ctrl
#1
siNT NT	1	1
siNT VNB	0.443347	0.4765
siMAD2L1 NT	0.481836	0.316295
siMAD2L1 VNB	0.510084	0.389805
#2
siNT NT	1	1
siNT VNB	0.608051	0.541566
siMAD2L1 NT	0.00965466	0.00326266
siMAD2L1 VNB	0.0110885
REN
#1
siNT NT	1	1
siNT VNB	0.260266	1.41144
siMAD2L1 NT	0.35611	0.146318
siMAD2L1 VNB	0.308548	0.376844
#2
siNT NT	1	1
siNT VNB	0.369713	0.174745
siMAD2L1 NT	0.00115609	0.00584141
siMAD2L1 VNB	0.0269039	0.00311314

## Sheet: FIGURE 3
FIGURE 3A
	BRCA1 norm to Ctrl	BRCA1 norm to Ctrl		MAD2L1 norm to Ctrl	MAD2L1 norm to Ctrl
MSTO-211H NT	1	1		1	1
MSTO-211H VNB	0.658003	0.234586		0.859884	1.51863
MVR NT	0.207451	0.0198827		0.0174453	0.0197295
MVR VNB	0.104954	0.0240742		0.015362	0.100899
	BRCA1 norm to Ctrl	BRCA1 norm to Ctrl		MAD2L1 norm to Ctrl	MAD2L1 norm to Ctrl
REN NT	1	1		1	1
REN VNB	0.0694351	0.0488972		0.586688	0.102061
RVR NT	0.444486	0.26141		0.153643	0.428672
RVR VNB	0.248848	0.0251032		0.170705	0.229162
FIGURE 3F
	BUBR1 norm to Ctrl	BUBR1 norm to Ctrl
MSTO-211H NT	1	1
MSTO-211H VNB	1.07124	1.05315
MVR NT	2.76272	5.79838
MVR VNB	2.47883	5.35452
REN NT	1	1
REN VNB	0.622077	0.315166
RVR NT	1.23021	0.752476
RVR VNB	0.435172	0.19865
