# Supplementary material for: BRCA1/MAD2L1 Deficiency Disrupts the Spindle Assembly Checkpoint to Confer Vinorelbine Resistance in Mesothelioma
Source: Oxford University Press journal article supplement (doi:10.1158/1535-7163.mct-20-0363), 2020-11-06
Supplement: 15357163mct200363-sup-242624_2_supp_6663009_qwwm2l.docx [file 15357163mct200363-sup-242624_2_supp_6663009_qwwm2l.docx]

**Supplementary Table 1. Patient characteristics (explants cohort, n=20)**

|  | **BRCA1/MAD2L1 positive** | **BRCA1/MAD2L1 negative** | **BRCA1 negative**  **MAD2L1 positive** |
| --- | --- | --- | --- |
| **Age (median (IQR))** | 70 (60.5-73.5) | 61.5 (48-75) | 67 |
| **Sex (N (%))**  M  F | 10 (50)  7 (35) | 1 (5)  1 (5) | 0 (0)  1 (5) |
| **Histology**  **(N (%))**  Epithelioid  Biphasic | 16 (80)  1 (5) | 2 (10)  0 (0) | 1 (5)  0 (0) |
| **Treatment prior surgery**  **(N %)** | 2 (10) | 0 (0 ) | 0 (0 ) |
