# Supplementary material for: BRCA1/MAD2L1 Deficiency Disrupts the Spindle Assembly Checkpoint to Confer Vinorelbine Resistance in Mesothelioma
Source: Oxford University Press journal article supplement (doi:10.1158/1535-7163.mct-20-0363), 2020-11-06
Supplement: 15357163mct200363-sup-242624_2_supp_6663010_qkkm2l.docx [file 15357163mct200363-sup-242624_2_supp_6663010_qkkm2l.docx]

**Supplementary Table 2. Patient characteristics**

|  | **BRCA1/MAD2L1 positive** | **BRCA1/MAD2L1 negative** | **BRCA1 positive**  **MAD2L1 negative** | **BRCA1 negative**  **MAD2L1 positive** |
| --- | --- | --- | --- | --- |
| **Age (median (IQR))** | 66 (56.75-72) | 67 (64.5-69.75) | 66 (62.75-68.25) | 64 (59.25-70.5) |
| **Sex (N (%))**  M  F | 19 (39.6)  4 (8.3) | 3 (6.2)  3 (6.2) | 11 (22.9)  2 (4.2) | 6 (12.5)  0 (0) |
| **Histology**  **(N (%))**  Epithelioid  Biphasic  Desmoplastic  Not reported | 19 (39.6)  1 (2.1)  0 (0)  2 (4.2) | 5 (10.4)  1 (2.1)  0 (0)  0 (0) | 12 (25)  1 (2.1)  1 (2.1)  3 (6.2) | 3 (6.2)  0 (0)  0 (0)  0 (0) |
| **Treatment**  **(N %)**  ASC  Vinorelbine  **Second line** Vinorelbine | 9 (18.8)  9 (18.8)  5 (10.4) | 2 (4.2)  2 (4.2)  2 (4.2) | 6 (12.5)  7 (14.6)  0 (0) | 3 (6.2)  0 (0)  3 (6.2) |
